# Supplementary material for: Resistant starch attenuates impaired lipid biosynthesis induced by dietary oxidized oil via activation of insulin signaling pathways
Source: Royal Society of Chemistry journal article supplement (doi:10.1039/c7ra08855h), 2017-01-01
Supplement: c7ra08855h1.pdf [file c7ra08855h1.pdf]

**Fig. S1.** Top thirty significantly enriched gene ontology (GO) categories ( $P < 0.05$ ) of DEGs between groups. FO, fresh canola oil (unheated oil); DO, deep-fried canola oil; DO-RS, deep-fried canola oil plus resistant starch.

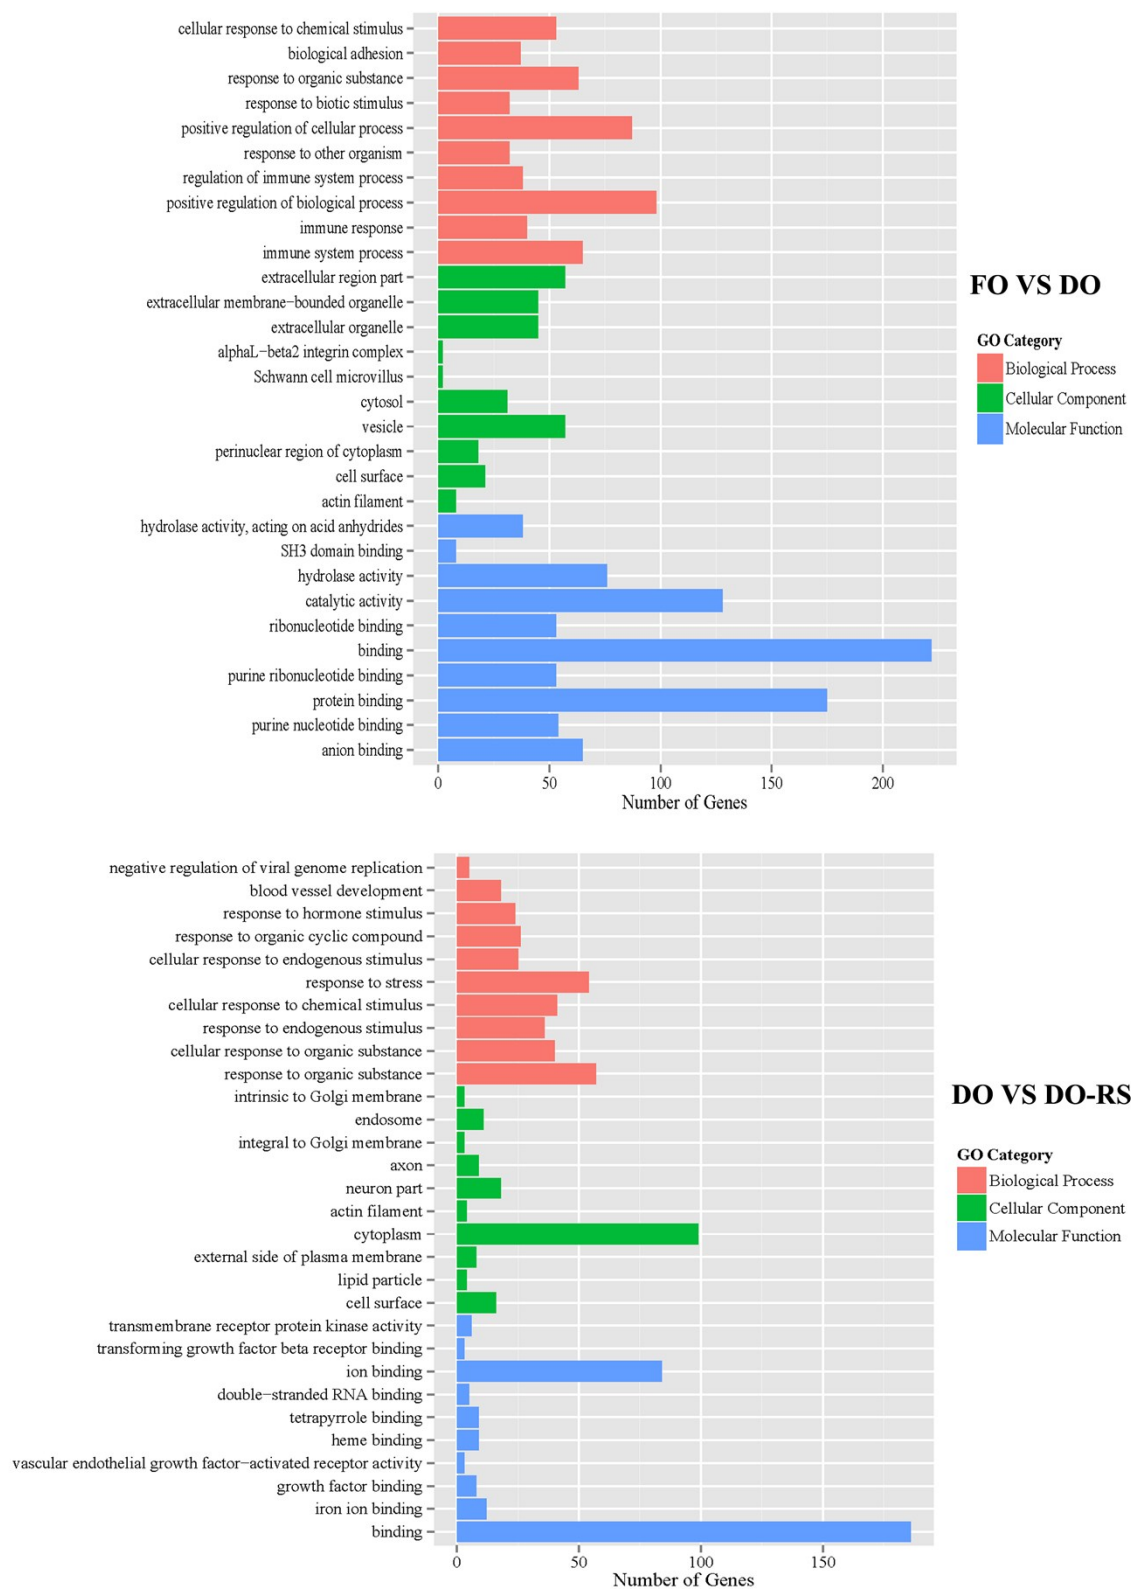

**Fig. S2.** Effect of RS on hepatic expression of lipid metabolism related proteins in rats fed with deep-fried oil. Protein expression of *Insig-1* and plasmalemma vesicle-associated protein was measured by Western blotting. GAPDH and Actin were internal controls.

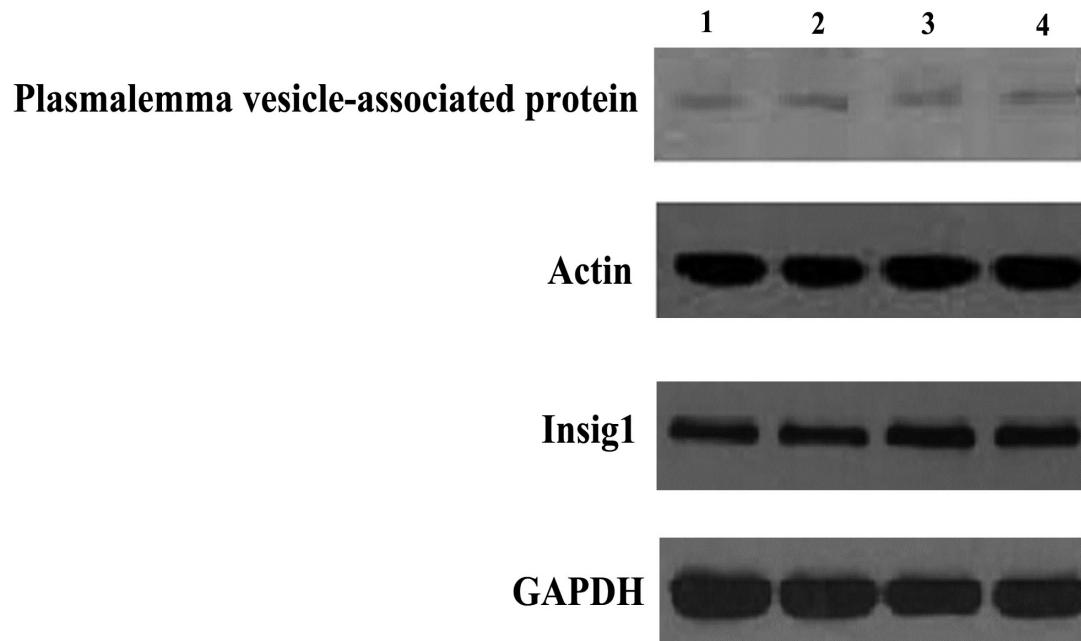

**Table S1.** Main ingredients of the basal diet.

| Ingredient                   | %     |
|------------------------------|-------|
| Casein                       | 20.0  |
| Lard                         | 3.0   |
| Soybean oil                  | 2.0   |
| Vitamin mixture <sup>a</sup> | 1.0   |
| Mineral mixture <sup>b</sup> | 4.0   |
| Choline chloride             | 0.2   |
| Cellulose                    | 4.0   |
| Corn starch                  | 65.8  |
| Total                        | 100.0 |

<sup>a</sup>AIN-93: vitamin mixture; <sup>b</sup>AIN-93: mineral mixture.

**Table S2.** Summary of read numbers aligned onto the rat reference genome. NC: normal control; FO: fresh canola oil (unheated oil); DO: deep-fried oil; DO-RS: deep-fried oil plus resistant starch.

| Statistical content   | NC       |      | FO       |      | DO       |      | DO-RS    |      |
|-----------------------|----------|------|----------|------|----------|------|----------|------|
|                       | Number   | %    | Number   | %    | Number   | %    | Number   | %    |
| Total reads           | 69983566 | 100  | 40774190 | 100  | 44834630 | 100  | 46929320 | 100% |
| Mapped reads          | 62820515 | 89.8 | 36010057 | 88.3 | 39834478 | 88.8 | 41518807 | 88.5 |
| Uniquely mapped reads | 59945145 | 85.8 | 34211316 | 83.9 | 37808432 | 84.3 | 39431014 | 84.0 |
| Multiple mapped reads | 2875370  | 4.1  | 1798741  | 4.4  | 2026046  | 4.5  | 2087793  | 4.4  |
| Non splice reads      | 30302215 | 43.3 | 17629594 | 43.2 | 19431527 | 43.3 | 20233328 | 43.1 |
| Splice reads          | 29642930 | 42.4 | 16581722 | 40.7 | 18376905 | 41.0 | 19197686 | 40.9 |

NC: normal control; FO: fresh canola oil (unheated oil); DO: deep-fried oil; DO-RS: deep-fried oil plus resistant starch.

**Table S3.** Adipose tissue weights of rats.

| Groups | Body weight (g) | Epididymis fat pad weight | Perirenal fat weigh  |
|--------|-----------------|---------------------------|----------------------|
|        |                 | (g/100g body weight)      | (g/100g body weight) |
| NC     | 429.1±26.3      | 1.32±0.12                 | 1.99±0.17            |
| FO     | 442.3±31.9      | 1.51±0.22                 | 2.14±0.47            |
| DO     | 425.4±18.4      | 1.46±0.15                 | 1.93±0.45            |
| DO-RS  | 455.0±18.7      | 1.53±0.18                 | 2.26±0.47            |

NC, normal control; FO, fresh canola oil (unheated oil); DO, deep-fried oil; DO-RS, deep-fried oil and resistant starch.
